# Supplementary material for: The gut microbiome of exudivorous marmosets in the wild and captivity
Source: PubMed Central journal article supplement (PMC8942988; doi:10.1038/s41598-022-08797-7), 2022-03-23

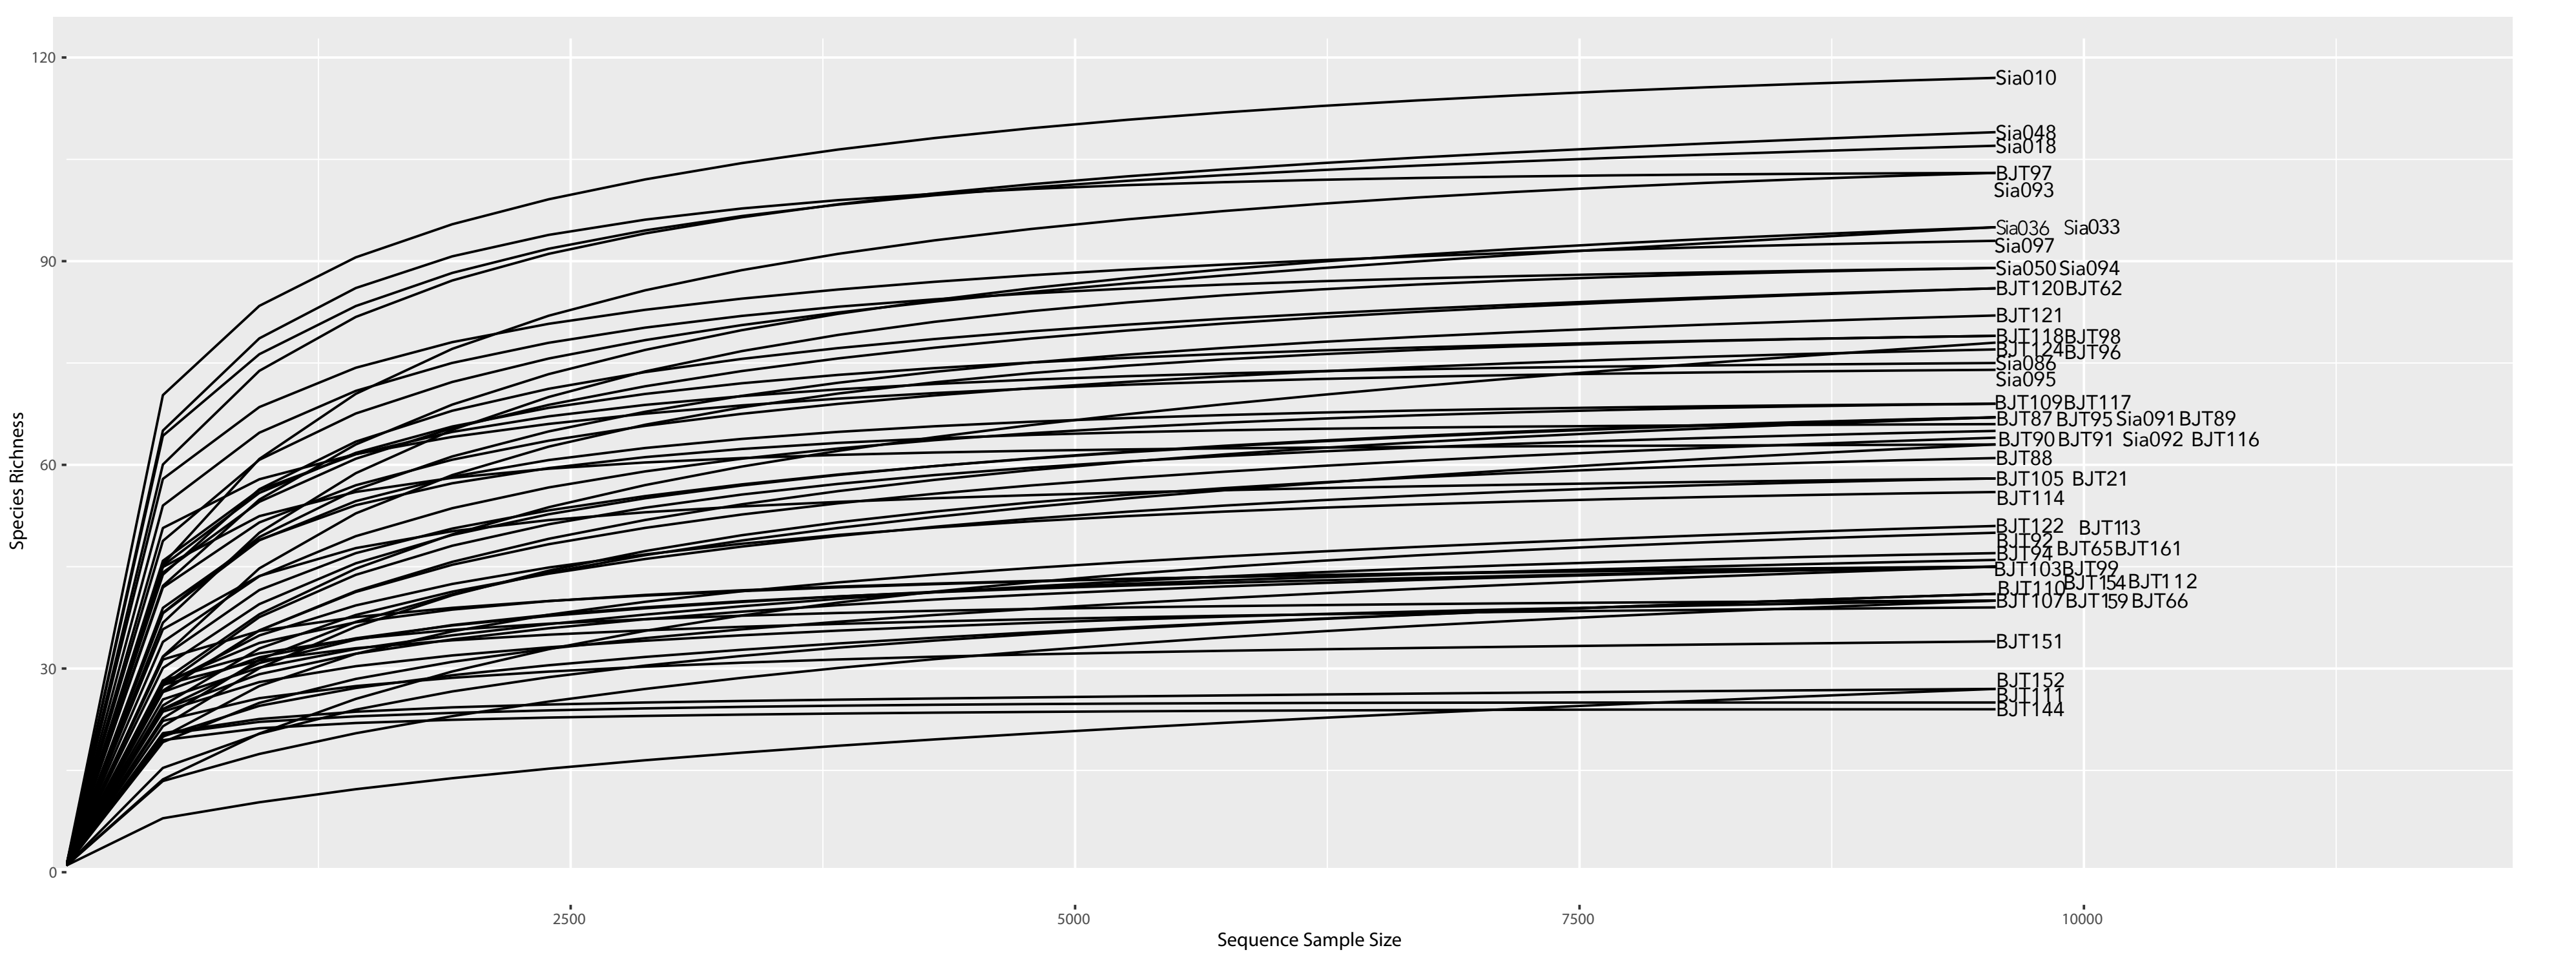

Supplement: 41598_2022_8797_MOESM7_ESM.pdf [file 41598_2022_8797_MOESM7_ESM.pdf]
